# Supplementary material for: Supercapacitive performance of C-axis preferentially oriented TiO2 nanotube arrays decorated with MoO3 nanoparticles
Source: Royal Society of Chemistry journal article supplement (doi:10.1039/d2cp05075g), 2023-01-01
Supplement: d2cp05075g1.pdf [file d2cp05075g1.pdf]

## Supporting information

Supercapacitive performance of C-axis preferentially oriented TiO<sub>2</sub>  
nanotube arrays decorated with MoO<sub>3</sub> nanoparticles

Liuji Wang, Pengfa Li, Jie Yang, Zhihua Ma\* and Laiping Zhang\*

*College of Chemistry and materials science, Xinxiang university,*

*Xinxiang 453003, People's Republic of China*

E-mail: [xxmazh@163.com](mailto:xxmazh@163.com) (Zhihua Ma) [zhanglp576@163.com](mailto:zhanglp576@163.com) (Laiping Zhang)

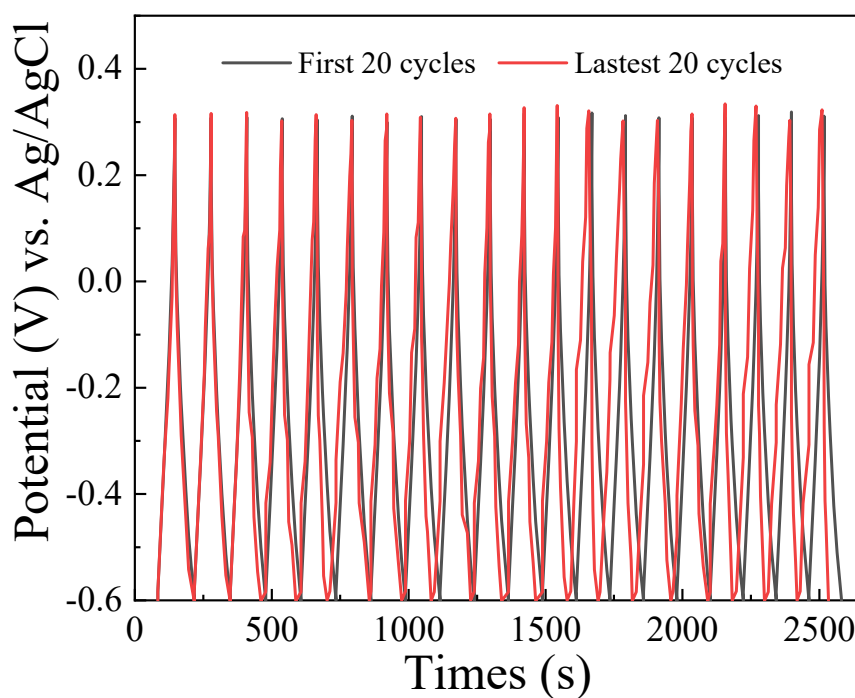

Figure 1. The first 20 and last 20 cycles charge-discharge curves for MoO<sub>3</sub>-p-MTNAs electrode at current density of 1 A/g.

The cycling life test for MoO<sub>3</sub>-p-MTNAs film electrodes were carried out through a cyclic galvanostatic charge-discharge process over 2000 cycles at current density of 1 A/g. The charge-discharge curves are more or less the same as that of the first cycle after 2000 cycles of measurement. This result illustrates the p-MTNAs electrode has a good capacitance recovery and excellent long-term stability.

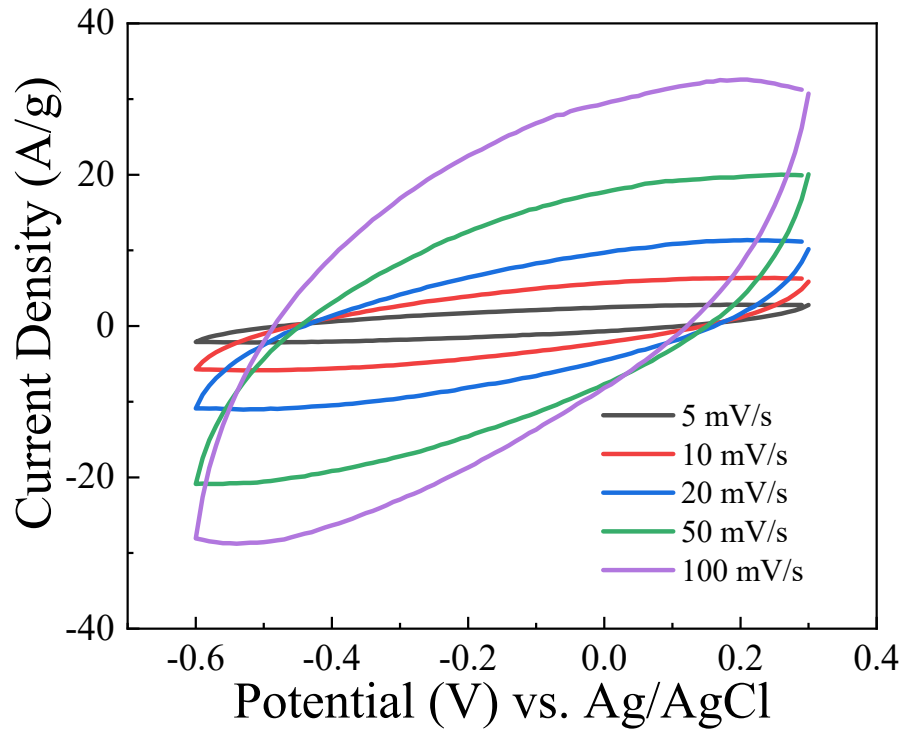

Figure 2. CV curves of Symmetric Supercapacitor (SSC) device performance at different scan rates.

The SSC had consisted of two  $\text{MoO}_3$ -p-CTNTAs layers as the positive and negative electrodes with PVA/KCl gel electrolyte. The CV curves at different scan rates (5–100 mV/s) in voltage window 0–1 V are shown in Figure 3. With increasing scan rate, the CV curves retain their quasi-rectangular shape without any redox peak, which implies that the fabricated device performs as an EDLC.
